# Supplementary material for: Risk of Subsequent Primary Cancer in Thyroid Cancer Survivors: A Nationwide Population-Based Study
Source: MDPI journal article supplement (doi:10.3390/diagnostics13182903), 2023-09-11
Supplement: s1 [file s1]

**Supplementary table S1. Baseline characteristics of study participants with health screening data**

|                            | Overall         | Case            | Control         | <i>P-value</i> |
|----------------------------|-----------------|-----------------|-----------------|----------------|
| Total number, n            | 258,585         | 141,952         | 116,633         |                |
| Age (years), mean $\pm$ SD | 49.9 $\pm$ 10.9 | 49.8 $\pm$ 10.8 | 50.0 $\pm$ 11.0 | < 0.001        |
| Sex, n (%)                 |                 |                 |                 | < 0.001        |
| Male                       | 60,133 (23.3)   | 32,490 (22.9)   | 27,643 (23.7)   |                |
| Female                     | 198,452 (76.8)  | 109,462 (77.1)  | 88,990 (76.3)   |                |
| Region of residence, n (%) |                 |                 |                 | < 0.001        |
| Urban                      | 126,209 (48.8)  | 69,979 (49.3)   | 56,230 (48.2)   |                |
| Rural                      | 132,376 (51.2)  | 71,973 (50.7)   | 60,403 (51.8)   |                |
| Income level, n (%)        |                 |                 |                 | < 0.001        |
| 1 (lowest)                 | 41,140 (15.9)   | 22,268 (15.7)   | 18,872 (16.2)   |                |
| 2                          | 37,871 (14.6)   | 20,661 (14.6)   | 17,210 (14.8)   |                |
| 3                          | 42,088 (16.3)   | 23,618 (16.6)   | 18,470 (15.8)   |                |
| 4                          | 56,368 (21.8)   | 31,448 (22.2)   | 24,920 (21.4)   |                |
| 5 (highest)                | 81,118 (31.4)   | 43,957 (31.0)   | 37,161 (31.9)   |                |
| CCI score                  |                 |                 |                 | <0.001         |
| 0                          | 63,422 (24.5)   | 63,340 (44.6)   | 82 (0.1)        |                |
| 1                          | 88,756 (34.3)   | 39,467 (27.8)   | 49,289 (42.3)   |                |
| 2                          | 34,359 (13.3)   | 18,985 (13.4)   | 15,374 (13.2)   |                |
| 3                          | 22,875 (8.8)    | 13,174 (9.3)    | 9,701 (8.3)     |                |
| $\geq 4$                   | 16,767 (6.5)    | 10,055 (7.1)    | 6,712 (5.8)     |                |
| Obesity <sup>a</sup>       |                 |                 |                 | <0.001         |
| Underweight                | 7,324 (2.8)     | 3,472 (2.4)     | 3,852 (3.3)     |                |
| Normal                     | 100,905 (39.0)  | 52,170 (36.8)   | 48,735 (41.8)   |                |
| Overweight                 | 63,497 (24.6)   | 34,679 (24.4)   | 28,818 (24.7)   |                |
| Obesity I                  | 75,443 (29.2)   | 44,316 (31.2)   | 31,127 (26.7)   |                |
| Obesity II                 | 11,416 (4.4)    | 7,315 (5.2)     | 4,101 (3.5)     |                |
| Smoking                    |                 |                 |                 | <0.001         |
| Never                      | 211,094 (81.6)  | 116,839 (82.3)  | 94,255 (80.8)   |                |
| Former                     | 22,508 (8.7)    | 13,408 (9.4)    | 9,100 (7.8)     |                |
| Current                    | 24,983 (9.7)    | 11,705 (8.2)    | 13,278 (11.4)   |                |

CCI, Charlson Comorbidity Index. <sup>a</sup>Body mass index (kg/m<sup>2</sup>) was categorized as <18.5 (underweight),  $\geq 18.5$  to <23 (normal),  $\geq 23$  to <25 (overweight),  $\geq 25$  to <30 (obesity I), and  $\geq 30$  (obesity II).

**Supplementary table S2. Incidence and hazard ratios of subsequent primary cancer for patients with thyroid cancer and matched controls (participants with data on obesity and smoking status).**

| Type of SPC                        | Case<br>(n = 141,952) | Control<br>(n = 116,633) | Crude HR<br>(95% CI) | Adjusted HR <sup>a</sup><br>(95% CI) |
|------------------------------------|-----------------------|--------------------------|----------------------|--------------------------------------|
| All SPCs                           | 25,660 (18.1)         | 14,797 (12.7)            | 1.67 (1.64-1.71)     | 1.58 (1.55-1.62)                     |
| Head and Neck (C00–14, C30–32)     | 532 (0.4)             | 243 (0.2)                | 2.07 (1.78-2.41)     | 1.92 (1.64-2.24)                     |
| Digestive system (C15–26)          | 10,811 (7.6)          | 6,662 (5.7)              | 1.57 (1.52-1.62)     | 1.47 (1.42-1.51)                     |
| Gastrointestinal tract (C15–20)    | 4,721 (3.3)           | 2,709 (2.3)              | 1.67 (1.59-1.75)     | 1.60 (1.52-1.68)                     |
| Esophagus (C15)                    | 74 (0.1)              | 29 (0.0)                 | 2.50 (1.62-3.85)     | 2.35 (1.51-3.63)                     |
| Stomach (C16)                      | 1,377 (1.0)           | 1,008 (0.9)              | 1.32 (1.22-1.44)     | 1.27 (1.17-1.38)                     |
| Colon and rectum (C18–20)          | 3,226 (2.3)           | 1,642 (1.4)              | 1.86 (1.76-1.98)     | 1.79 (1.68-1.90)                     |
| Hepato-biliary-pancreatic (C22–25) | 5,814 (4.1)           | 3,728 (3.2)              | 1.52 (1.46-1.58)     | 1.39 (1.34-1.45)                     |
| Liver and biliary tract (C22–24)   | 4,041 (2.8)           | 2,520 (2.2)              | 1.55 (1.47-1.63)     | 1.42 (1.35-1.49)                     |
| Pancreas (C25)                     | 1,773 (1.2)           | 1,208 (1.0)              | 1.45 (1.35-1.57)     | 1.33 (1.24-1.44)                     |
| Lung (C34)                         | 2,172 (1.5)           | 1,149 (1.0)              | 1.85 (1.72-1.99)     | 1.79 (1.66-1.92)                     |
| Bone and soft tissue (C40–C41)     | 121 (0.1)             | 48 (0.0)                 | 2.32 (1.66-3.25)     | 2.27 (1.62-3.19)                     |
| Limb (C40)                         | 41 (0.0)              | 10 (0.0)                 | 3.73 (1.86-7.46)     | 3.50 (1.74-7.05)                     |
| Other sites (C41)                  | 80 (0.1)              | 38 (0.0)                 | 1.95 (1.32-2.88)     | 1.94 (1.31-2.88)                     |
| Skin (C43–44)                      | 343 (0.2)             | 218 (0.2)                | 1.58 (1.33-1.87)     | 1.52 (1.28-1.81)                     |
| Breast (C50)                       | 3,091 (2.2)           | 1,352 (1.2)              | 2.08 (1.96-2.22)     | 2.02 (1.90-2.16)                     |
| Female genital system (C51–58)     | 3,332 (2.3)           | 2,136 (1.8)              | 1.46 (1.38-1.54)     | 1.40 (1.33-1.48)                     |
| Cervix (C53)                       | 581 (0.4)             | 395 (0.3)                | 1.33 (1.17-1.52)     | 1.27 (1.12-1.45)                     |
| Uterus (C54–C55)                   | 842 (0.6)             | 581 (0.5)                | 1.42 (1.28-1.58)     | 1.35 (1.21-1.51)                     |
| Ovary (C56–C57)                    | 1,892 (1.3)           | 1,149 (1.0)              | 1.53 (1.42-1.64)     | 1.48 (1.37-1.59)                     |
| Male genital system (C60–C63)      | 1,788 (1.3)           | 1,382 (1.2)              | 1.51 (1.41-1.62)     | 1.38 (1.29-1.49)                     |
| Prostate (C61)                     | 1,752 (1.2)           | 1,359 (1.2)              | 1.50 (1.40-1.62)     | 1.38 (1.28-1.48)                     |
| Urinary system (C64–C68)           | 1,430 (1.0)           | 974 (0.8)                | 1.46 (1.35-1.59)     | 1.37 (1.26-1.49)                     |
| Kidney (C64)                       | 560 (0.4)             | 300 (0.3)                | 1.84 (1.60-2.12)     | 1.68 (1.46-1.94)                     |
| Bladder (C67)                      | 757 (0.6)             | 621 (0.5)                | 1.27 (1.14-1.41)     | 1.21 (1.08-1.34)                     |
| Eye, orbit (C69)                   | 34 (0.0)              | 16 (0.0)                 | 2.03 (1.12-3.70)     | 2.09 (1.14-3.84)                     |
| Brain, CNS (C70–C72)               | 274 (0.2)             | 121 (0.)                 | 2.19 (1.77-2.72)     | 2.08 (1.68-2.59)                     |
| Adrenal gland (C74)                | 77 (0.1)              | 20 (0.0)                 | 3.56 (2.17-5.82)     | 3.42 (2.08-5.63)                     |
| Hematologic system (C81–C96)       | 755 (0.5)             | 319 (0.3)                | 2.28 (1.99-2.60)     | 2.10 (1.84-2.40)                     |
| Hodgkin Disease (C81)              | 11 (0.0)              | 7 (0.0)                  | 1.50 (0.58-3.90)     | 1.21 (0.46-3.19)                     |
| Non-Hodgkin lymphoma (C82–C86)     | 317 (0.2)             | 111 (0.1)                | 2.66 (2.14-3.30)     | 2.41 (1.93-3.00)                     |
| Multiple myeloma (C90)             | 166 (0.1)             | 95 (0.1)                 | 1.75 (1.35-2.25)     | 1.59 (1.23-2.05)                     |
| Leukemia (C91–C95)                 | 183 (0.1)             | 64 (0.1)                 | 2.77 (2.08-3.69)     | 2.63 (1.97-3.52)                     |

SPC, subsequent primary cancer; HR, hazard ratio; CI, confidence interval; C, diagnostic code used in the International Classification of Diseases (ICD)-10; CNS, central nervous system. Hazard ratios were determined by Cox proportional hazard models. <sup>a</sup>Adjusted HR for age, sex, region of residence, income, Charlson Comorbidity Index, obesity, and smoking status.

**Supplementary table S3. Incidence and hazard ratios of subsequent primary cancer for patients with thyroid cancer and matched controls adjusted according to sex.**

| Type of SPC                        | Male                 |                         |                                      | Female                |                          |                                      |
|------------------------------------|----------------------|-------------------------|--------------------------------------|-----------------------|--------------------------|--------------------------------------|
|                                    | Case<br>(n = 82,470) | Control<br>(n = 82,469) | Adjusted HR<br>(95% CI) <sup>a</sup> | Case<br>(n = 350,184) | Control<br>(n = 350,185) | Adjusted HR<br>(95% CI) <sup>a</sup> |
| All SPCs                           | 16,614 (20.2)        | 11,410 (13.8)           | 1.51 (1.47-1.55)                     | 61,970 (17.7)         | 38,569 (11.0)            | 1.66 (1.63-1.68)                     |
| Head and Neck (C00–14, C30–32)     | 771 (0.9)            | 239 (0.3)               | 2.81 (2.43-3.26)                     | 1,299 (0.4)           | 614 (0.2)                | 2.05 (1.86-2.26)                     |
| Digestive system (C15–26)          | 6,802 (8.3)          | 5,179 (6.3)             | 1.36 (1.31-1.41)                     | 24,716 (7.1)          | 16,887 (4.8)             | 1.45 (1.42-1.48)                     |
| Gastrointestinal tract (C15–20)    | 3,372 (4.1)          | 2,311 (2.8)             | 1.46 (1.38-1.54)                     | 10,832 (3.1)          | 6,578 (1.9)              | 1.61 (1.56-1.67)                     |
| Esophagus (C15)                    | 152 (0.2)            | 49 (0.1)                | 2.70 (1.94-3.75)                     | 131 (0.0)             | 54 (0.0)                 | 2.37 (1.71-3.27)                     |
| Stomach (C16)                      | 1,149 (1.4)          | 991 (1.2)               | 1.15 (1.06-1.26)                     | 2,946 (0.8)           | 2,267 (0.7)              | 1.26 (1.19-1.33)                     |
| Colon and rectum (C18–20)          | 2,033 (2.5)          | 1,245 (1.5)             | 1.65 (1.53-1.78)                     | 7,653 (2.2)           | 4,184 (1.2)              | 1.80 (1.74-1.87)                     |
| Hepato-biliary-pancreatic (C22–25) | 3,327 (4.0)          | 2,743 (3.3)             | 1.30 (1.24-1.37)                     | 13,221 (3.8)          | 9,689 (2.8)              | 1.37 (1.33-1.40)                     |
| Liver and biliary tract (C22–24)   | 2,516 (3.1)          | 2,049 (2.5)             | 1.31 (1.24-1.39)                     | 8,967 (2.6)           | 6,569 (1.9)              | 1.37 (1.32-1.41)                     |
| Pancreas (C25)                     | 811 (1.0)            | 694 (0.8)               | 1.27 (1.14-1.41)                     | 4,254 (1.2)           | 3,120 (0.9)              | 1.36 (1.30-1.43)                     |
| Lung (C34)                         | 1,482 (1.8)          | 925 (1.1)               | 1.71 (1.57-1.86)                     | 5,131 (1.5)           | 2,757 (0.8)              | 1.86 (1.77-1.95)                     |
| Bone and soft tissue (C40–C41)     | 121 (0.2)            | 24 (0.0)                | 4.92 (3.15-7.69)                     | 299 (0.1)             | 114 (0.0)                | 2.55 (2.04-3.17)                     |
| Limb (C40)                         | 29 (0.0)             | 2 (0.0)                 | 15.56 (3.67-65.98)                   | 89 (0.0)              | 34 (0.0)                 | 2.62 (1.75-3.92)                     |
| Other sites (C41)                  | 92 (0.1)             | 22 (0.0)                | 3.99 (2.48-6.40)                     | 210 (0.1)             | 80 (0.0)                 | 2.51 (1.94-3.27)                     |
| Skin (C43–44)                      | 221 (0.3)            | 163 (0.2)               | 1.43 (1.16-1.76)                     | 875 (0.3)             | 568 (0.2)                | 1.60 (1.43-1.78)                     |
| Breast (C50)                       | 76 (0.1)             | 7 (0.0)                 | 10.48 (4.78-22.95)                   | 10,382 (3.0)          | 5,166 (1.5)              | 2.12 (2.05-2.20)                     |
| Female genital system (C51–58)     | 0 (0.0)              | 0 (0.0)                 | -                                    | 10,810 (3.1)          | 8,312 (2.4)              | 1.47 (1.43-1.51)                     |
| Cervix (C53)                       | 0 (0.0)              | 0 (0.0)                 | -                                    | 1,975 (0.6)           | 1,518 (0.4)              | 1.35 (1.26-1.45)                     |
| Uterus (C54–C55)                   | 0 (0.0)              | 0 (0.0)                 | -                                    | 2,689 (0.8)           | 2,123 (0.6)              | 1.46 (1.37-1.54)                     |
| Ovary (C56–C57)                    | 0 (0.0)              | 0 (0.0)                 | -                                    | 6,090 (1.7)           | 4,615 (1.3)              | 1.52 (1.46-1.58)                     |
| Male genital system (C60–C63)      | 4,549 (5.5)          | 3,815 (4.6)             | 1.25 (1.20-1.31)                     | 0 (0.0)               | 0 (0.0)                  | -                                    |
| Prostate (C61)                     | 4,478 (5.4)          | 3,764 (4.6)             | 1.25 (1.19-1.31)                     | 0 (0.0)               | 0 (0.0)                  | -                                    |
| Urinary system (C64–C68)           | 1,053 (1.3)          | 604 (0.7)               | 1.78 (1.60-1.97)                     | 3,124 (0.9)           | 2,336 (0.7)              | 1.38 (1.30-1.46)                     |
| Kidney (C64)                       | 513 (0.6)            | 189 (0.2)               | 2.68 (2.26-3.18)                     | 1,120 (0.3)           | 632 (0.2)                | 1.76 (1.59-1.94)                     |
| Bladder (C67)                      | 482 (0.6)            | 370 (0.5)               | 1.37 (1.19-1.57)                     | 1,810 (0.5)           | 1,570 (0.5)              | 1.21 (1.13-1.30)                     |
| Eye, orbit (C69)                   | 17 (0.0)             | 6 (0.0)                 | 3.35 (1.28-8.76)                     | 56 (0.0)              | 35 (0.0)                 | 1.73 (1.12-2.67)                     |
| Brain, CNS (C70–C72)               | 182 (0.2)            | 73 (0.1)                | 2.85 (2.15-3.77)                     | 786 (0.2)             | 395 (0.1)                | 2.03 (1.79-2.29)                     |
| Adrenal gland (C74)                | 54 (0.1)             | 8 (0.01)                | 6.58 (3.09-14.00)                    | 224 (0.1)             | 60 (0.0)                 | 3.71 (2.78-4.96)                     |
| Hematologic system (C81–C96)       | 619 (0.8)            | 252 (0.3)               | 2.42 (2.08-2.82)                     | 1,860 (0.5)           | 883 (0.3)                | 2.07 (1.91-2.25)                     |
| Hodgkin Disease (C81)              | 17 (0.0)             | 6 (0.0)                 | 2.81 (1.08-7.31)                     | 37 (0.0)              | 14 (0.0)                 | 2.78 (1.49-5.20)                     |
| Non-Hodgkin lymphoma (C82–C86)     | 301 (0.4)            | 92 (0.1)                | 3.06 (2.41-3.88)                     | 864 (0.3)             | 348 (0.1)                | 2.29 (2.02-2.60)                     |
| Multiple myeloma (C90)             | 114 (0.1)            | 76 (0.1)                | 1.56 (1.16-2.11)                     | 380 (0.1)             | 264 (0.1)                | 1.46 (1.24-1.71)                     |
| Leukemia (C91–C95)                 | 133 (0.2)            | 45 (0.1)                | 2.90 (2.05-4.10)                     | 414 (0.1)             | 164 (0.1)                | 2.67 (2.22-3.21)                     |

HR, hazard ratio; CI, confidence interval; C, diagnostic code used in the International Classification of Diseases (ICD)-10; CNS, central nervous system. <sup>a</sup>Adjusted HR for Charlson Comorbidity Index.

**Supplementary table S4. Incidence and hazard ratios of subsequent primary cancer for patients with thyroid cancer and matched controls adjusted according to age.**

| Type of SPC                        | Age < 40 years        |                          |                                      | Age ≥ 40 years        |                          |                                      |
|------------------------------------|-----------------------|--------------------------|--------------------------------------|-----------------------|--------------------------|--------------------------------------|
|                                    | Case<br>(n = 101,950) | Control<br>(n = 101,959) | Adjusted HR<br>(95% CI) <sup>a</sup> | Case<br>(n = 330,704) | Control<br>(n = 330,695) | Adjusted HR<br>(95% CI) <sup>a</sup> |
| All SPCs                           | 11,660 (11.4)         | 7,737 (7.6)              | 1.95 (1.90-2.01)                     | 66,924 (20.2)         | 42,242 (12.7)            | 1.59 (1.57-1.61)                     |
| Head and Neck (C00–14, C30–32)     | 218 (0.2)             | 94 (0.1)                 | 2.62 (2.04-3.36)                     | 1,852 (0.6)           | 759 (0.2)                | 2.28 (2.09-2.48)                     |
| Digestive system (C15–26)          | 3,931 (3.9)           | 2,647 (2.6)              | 1.84 (1.75-1.94)                     | 27,587 (8.3)          | 19,419 (5.9)             | 1.40 (1.37-1.42)                     |
| Gastrointestinal tract (C15–20)    | 1,640 (1.6)           | 820 (0.8)                | 2.46 (2.26-2.68)                     | 12,564 (3.8)          | 8,069 (2.4)              | 1.51 (1.47-1.56)                     |
| Esophagus (C15)                    | 9 (0.0)               | 5 (0.0)                  | 2.03 (0.65-6.31)                     | 274 (0.1)             | 98 (0.0)                 | 2.61 (2.06-3.30)                     |
| Stomach (C16)                      | 375 (0.4)             | 301 (0.23)               | 1.60 (1.37-1.87)                     | 3,720 (1.3)           | 2,957 (0.9)              | 1.21 (1.15-1.27)                     |
| Colon and rectum (C18–20)          | 1,245 (1.2)           | 503 (0.5)                | 2.99 (2.69-3.33)                     | 8,441 (2.6)           | 4,926 (1.5)              | 1.67 (1.62-1.74)                     |
| Hepato-biliary-pancreatic (C22–25) | 2,186 (2.1)           | 1,740 (1.7)              | 1.56 (1.46-1.67)                     | 14,362 (4.3)          | 10,692 (3.2)             | 1.33 (1.30-1.36)                     |
| Liver and biliary tract (C22–24)   | 1,634 (1.6)           | 1,284 (1.3)              | 1.57 (1.45-1.69)                     | 9,849 (3.0)           | 7,334 (2.2)              | 1.33 (1.29-1.37)                     |
| Pancreas (C25)                     | 552 (0.5)             | 456 (0.5)                | 1.56 (1.37-1.77)                     | 4,513 (1.4)           | 3,358 (1.0)              | 1.33 (1.27-1.39)                     |
| Lung (C34)                         | 578 (0.6)             | 312 (0.3)                | 2.34 (2.03-2.69)                     | 6,035 (1.8)           | 3,370 (1.0)              | 1.79 (1.72-1.87)                     |
| Bone and soft tissue (C40–C41)     | 67 (0.1)              | 17 (0.0)                 | 4.38 (2.54-7.55)                     | 353 (0.1)             | 121 (0.0)                | 2.80 (2.27-3.45)                     |
| Limb (C40)                         | 27 (0.0)              | 3 (0.0)                  | 9.48 (2.79-32.14)                    | 91 (0.0)              | 33 (0.0)                 | 2.79 (1.86-4.18)                     |
| Other sites (C41)                  | 40 (0.0)              | 14 (0.0)                 | 3.32 (1.78-6.18)                     | 262 (0.1)             | 88 (0.0)                 | 2.80 (2.19-3.58)                     |
| Skin (C43–44)                      | 114 (0.1)             | 68 (0.1)                 | 2.21 (1.62-3.01)                     | 982 (0.3)             | 663 (0.2)                | 1.52 (1.37-1.68)                     |
| Breast (C50)                       | 1,842 (1.8)           | 1,071 (1.1)              | 2.36 (2.19-2.55)                     | 8,616 (2.6)           | 4,102 (1.2)              | 2.16 (2.08-2.24)                     |
| Female genital system (C51–58)     | 3,043 (3.0)           | 2,661 (2.6)              | 1.59 (1.51-1.68)                     | 7,767 (2.4)           | 5,651 (1.8)              | 1.47 (1.42-1.53)                     |
| Cervix (C53)                       | 397 (0.4)             | 394 (0.4)                | 1.26 (1.09-1.46)                     | 1,578 (0.5)           | 1,124 (0.3)              | 1.42 (1.31-1.53)                     |
| Uterus (C54–C55)                   | 726 (0.7)             | 592 (0.6)                | 1.89 (1.69-2.12)                     | 1,963 (0.6)           | 1,531 (0.5)              | 1.38 (1.29-1.48)                     |
| Ovary (C56–C57)                    | 1,911 (1.9)           | 1,661 (1.6)              | 1.58 (1.47-1.69)                     | 4,179 (1.3)           | 2,954 (0.9)              | 1.55 (1.47-1.62)                     |
| Male genital system (C60–C63)      | 236 (0.2)             | 192 (0.2)                | 1.61 (1.33-1.97)                     | 4,313 (1.3)           | 3,623 (1.1)              | 1.17 (1.12-1.23)                     |
| Prostate (C61)                     | 211 (0.2)             | 180 (0.2)                | 1.56 (1.27-1.92)                     | 4,267 (1.3)           | 3,584 (1.1)              | 1.17 (1.12-1.23)                     |
| Urinary system (C64–C68)           | 392 (0.4)             | 327 (0.3)                | 1.60 (1.37-1.86)                     | 3,785 (1.2)           | 2,613 (0.8)              | 1.46 (1.39-1.54)                     |
| Kidney (C64)                       | 165 (0.2)             | 99 (0.1)                 | 2.13 (1.65-2.76)                     | 1,468 (0.4)           | 722 (0.2)                | 1.97 (1.80-2.16)                     |
| Bladder (C67)                      | 207 (0.2)             | 210 (0.2)                | 1.36 (1.11-1.66)                     | 2,085 (0.6)           | 1,730 (0.5)              | 1.25 (1.17-1.33)                     |
| Eye, orbit (C69)                   | 6 (0.0)               | 7 (0.0)                  | 1.55 (0.49-4.87)                     | 67 (0.0)              | 34 (0.0)                 | 2.06 (1.35-3.14)                     |
| Brain, CNS (C70–C72)               | 163 (0.2)             | 87 (0.1)                 | 2.08 (1.59-2.72)                     | 805 (0.2)             | 381 (0.1)                | 2.16 (1.91-2.45)                     |
| Adrenal gland (C74)                | 62 (0.1)              | 10 (0.0)                 | 6.66 (3.38-13.12)                    | 216 (0.1)             | 58 (0.0)                 | 3.63 (2.71-4.88)                     |
| Hematologic system (C81–C96)       | 386 (0.4)             | 160 (0.2)                | 2.74 (2.27-3.32)                     | 2,093 (0.6)           | 975 (0.3)                | 2.07 (1.92-2.24)                     |
| Hodgkin Disease (C81)              | 16 (0.0)              | 9 (0.0)                  | 1.67 (0.72-3.88)                     | 38 (0.0)              | 11 (0.0)                 | 3.62 (1.83-7.15)                     |
| Non-Hodgkin lymphoma (C82–C86)     | 180 (0.2)             | 62 (0.1)                 | 3.04 (2.26-4.08)                     | 985 (0.3)             | 378 (0.1)                | 2.39 (2.12-2.69)                     |
| Multiple myeloma (C90)             | 46 (0.1)              | 27 (0.0)                 | 2.21 (1.34-3.62)                     | 448 (0.1)             | 313 (0.1)                | 1.43 (1.23-1.66)                     |
| Leukemia (C91–C95)                 | 114 (0.1)             | 36 (0.0)                 | 3.69 (2.51-5.42)                     | 433 (0.1)             | 173 (0.1)                | 2.53 (2.11-3.03)                     |

HR, hazard ratio; CI, confidence interval; C, diagnostic code used in the International Classification of Diseases (ICD)-10; CNS, central nervous system. <sup>a</sup>Adjusted HR for Charlson Comorbidity Index.

**Supplementary table S5-1. Incidence and hazard ratios of subsequent primary cancer for patients with thyroid cancer and matched controls adjusted according to latency period (continued)**

| Type of SPC                        | <2.0 years           |                         |                                      | 2.0-4.9 years        |                         |                                      |
|------------------------------------|----------------------|-------------------------|--------------------------------------|----------------------|-------------------------|--------------------------------------|
|                                    | Case<br>(n = 81,673) | Control<br>(n = 68,701) | Adjusted HR<br>(95% CI) <sup>a</sup> | Case<br>(n = 84,243) | Control<br>(n = 89,264) | Adjusted HR<br>(95% CI) <sup>a</sup> |
| All SPCs                           | 34,870 (42.7)        | 13,450 (19.6)           | 3.12 (3.05-3.18)                     | 19,373 (23.0)        | 12,629 (14.2)           | 2.21 (2.16-2.26)                     |
| Head and Neck (C00–14, C30–32)     | 1,368 (1.7)          | 331 (0.5)               | 4.47 (3.96-5.06)                     | 369 (0.4)            | 266 (0.3)               | 1.87 (1.59-2.20)                     |
| Digestive system (C15–26)          | 13,419 (16.4)        | 6,035 (8.8)             | 2.68 (2.60-2.77)                     | 8,152 (9.7)          | 5,613 (6.3)             | 2.05 (1.98-2.12)                     |
| Gastrointestinal tract (C15–20)    | 7,742 (9.5)          | 2,740 (4.0)             | 3.15 (3.00 -3.30)                    | 2,978 (3.5)          | 2,212 (2.5)             | 1.90 (1.79-2.01)                     |
| Esophagus (C15)                    | 186 (0.2)            | 22 (0.0)                | 9.24 (5.88-14.52)                    | 53 (0.1)             | 28 (0.0)                | 2.57 (1.61-4.11)                     |
| Stomach (C16)                      | 1,969 (2.4)          | 1,079 (1.6)             | 2.03 (1.88-2.19)                     | 961 (1.1)            | 822 (0.9)               | 1.66 (1.51-1.83)                     |
| Colon and rectum (C18–20)          | 5,515 (6.8)          | 1,608 (2.3)             | 3.84 (3.62-4.06)                     | 1,926 (2.3)          | 1,336 (1.5)             | 2.03 (1.89-2.18)                     |
| Hepato-biliary-pancreatic (C22–25) | 5,409 (6.6)          | 3,131 (4.6)             | 2.28 (2.18-2.38)                     | 4,974 (5.9)          | 3,191 (3.6)             | 2.20 (2.10-2.31)                     |
| Liver and biliary tract (C22–24)   | 4,063 (5.0)          | 2,312 (3.4)             | 2.33 (2.21-2.46)                     | 3,481 (4.1)          | 2,284 (2.6)             | 2.16 (2.05-2.28)                     |
| Pancreas (C25)                     | 1,346 (1.7)          | 819 (1.2)               | 2.13 (1.94-2.33)                     | 1,493 (1.8)          | 907 (1.0)               | 2.31 (2.12-2.51)                     |
| Lung (C34)                         | 2,732 (3.4)          | 895 (1.3)               | 3.73 (3.45-4.03)                     | 1,685 (2.0)          | 925 (1.0)               | 2.66 (2.45-2.89)                     |
| Bone and soft tissue (C40–C41)     | 242 (0.3)            | 49 (0.1)                | 5.76 (4.20-7.90)                     | 88 (0.1)             | 34 (0.0)                | 3.64 (2.43-5.46)                     |
| Limb (C40)                         | 66 (0.1)             | 14 (0.0)                | 5.71 (3.14-10.38)                    | 21 (0.0)             | 7 (0.0)                 | 4.41 (1.86-10.45)                    |
| Other sites (C41)                  | 176 (0.2)            | 35 (0.1)                | 5.78 (3.99-8.39)                     | 67 (0.1)             | 27 (0.0)                | 3.46 (2.19-5.47)                     |
| Skin (C43–44)                      | 397 (0.5)            | 167 (0.2)               | 2.95 (2.45-3.56)                     | 287 (0.3)            | 173 (0.2)               | 2.41 (1.98-2.92)                     |
| Breast (C50)                       | 5,702 (7.0)          | 1,561 (2.3)             | 4.08 (3.85-4.32)                     | 2,140 (2.5)          | 1,229 (1.4)             | 2.71 (2.52-2.92)                     |
| Female genital system (C51–58)     | 3,893 (4.8)          | 2,099 (3.1)             | 2.44 (2.31-2.57)                     | 2,896 (3.4)          | 2,140 (2.4)             | 2.04 (1.93-2.16)                     |
| Cervix (C53)                       | 1,014 (1.2)          | 531 (0.8)               | 2.24 (2.01-2.49)                     | 452 (0.5)            | 406 (0.5)               | 1.64 (1.43-1.88)                     |
| Uterus (C54–C55)                   | 832 (1.0)            | 469 (0.7)               | 2.22 (1.98-2.50)                     | 649 (0.8)            | 503 (0.6)               | 1.94 (1.72-2.18)                     |
| Ovary (C56–C57)                    | 2,019 (2.5)          | 1,082 (1.6)             | 2.65 (2.45-2.86)                     | 1,784 (2.1)          | 1,212 (1.4)             | 2.24 (2.08-2.42)                     |
| Male genital system (C60–C63)      | 1,779 (2.2)          | 972 (1.4)               | 2.31 (2.13-2.51)                     | 1,288 (1.5)          | 977 (1.1)               | 1.78 (1.63-1.94)                     |
| Prostate (C61)                     | 1,748 (2.1)          | 958 (1.4)               | 2.31 (2.13-2.51)                     | 1,271 (1.5)          | 964 (1.1)               | 1.78 (1.63-1.94)                     |
| Urinary system (C64–C68)           | 1,451 (1.8)          | 664 (1.0)               | 2.63 (2.39-2.89)                     | 1,052 (1.3)          | 741 (0.8)               | 2.02 (1.83-2.22)                     |
| Kidney (C64)                       | 747 (0.9)            | 230 (0.3)               | 3.74 (3.21-4.35)                     | 357 (0.4)            | 209 (0.2)               | 2.48 (2.08-2.95)                     |
| Bladder (C67)                      | 606 (0.7)            | 387 (0.6)               | 1.98 (1.74-2.26)                     | 650 (0.8)            | 495 (0.6)               | 1.85 (1.64-2.08)                     |
| Eye, orbit (C69)                   | 34 (0.0)             | 8 (0.0)                 | 5.10 (2.31-11.24)                    | 15 (0.0)             | 11 (0.0)                | 2.39 (1.07-5.34)                     |
| Brain, CNS (C70–C72)               | 440 (0.5)            | 119 (0.2)               | 4.56 (3.70-5.61)                     | 243 (0.3)            | 124 (0.1)               | 2.82 (2.26-3.52)                     |
| Adrenal gland (C74)                | 135 (0.2)            | 25 (0.0)                | 6.12 (3.96-9.46)                     | 70 (0.1)             | 13 (0.0)                | 8.53 (4.65-15.64)                    |
| Hematologic system (C81–C96)       | 1,318 (1.6)          | 363 (0.5)               | 3.85 (3.42-4.34)                     | 479 (0.6)            | 239 (0.3)               | 2.90 (2.47-3.40)                     |
| Hodgkin Disease (C81)              | 35 (0.0)             | 9 (0.0)                 | 4.21 (1.99-8.9)                      | 12 (0.0)             | 5 (0.0)                 | 3.14 (1.09-9.09)                     |
| Non-Hodgkin lymphoma (C82–C86)     | 819 (1.0)            | 184 (0.3)               | 4.38 (3.72-5.16)                     | 156 (0.2)            | 91 (0.1)                | 2.45 (1.88-3.19)                     |
| Multiple myeloma (C90)             | 156 (0.2)            | 59 (0.1)                | 3.26 (2.39-4.45)                     | 104 (0.1)            | 80 (0.1)                | 1.76 (1.31-2.37)                     |
| Leukemia (C91–C95)                 | 191 (0.2)            | 76 (0.1)                | 2.89 (2.19-3.80)                     | 160 (0.2)            | 37 (0.0)                | 6.61 (4.59-9.53)                     |

**Supplementary table S5-2. Incidence and hazard ratios of subsequent primary cancer for patients with thyroid cancer and matched controls adjusted according to latency period.**

| Type of SPC                        | 5.0-9.9 years         |                          |                                      | ≥10.0 years          |                          |                                      |
|------------------------------------|-----------------------|--------------------------|--------------------------------------|----------------------|--------------------------|--------------------------------------|
|                                    | Case<br>(n = 170,240) | Control<br>(n = 134,662) | Adjusted HR<br>(95% CI) <sup>a</sup> | Case<br>(n = 96,498) | Control<br>(n = 140,027) | Adjusted HR<br>(95% CI) <sup>a</sup> |
| All SPCs                           | 18,939 (11.1)         | 15,513 (11.5)            | 1.12 (1.10-1.15)                     | 5,402 (5.6)          | 8,387 (6.0)              | 1.21 (1.16-1.25)                     |
| Head and Neck (C00–14, C30–32)     | 261 (0.2)             | 175 (0.1)                | 1.34 (1.10-1.63)                     | 72 (0.1)             | 81 (0.1)                 | 1.59 (1.15-2.21)                     |
| Digestive system (C15–26)          | 7,854 (4.6)           | 6,888 (5.1)              | 1.02 (0.98-1.05)                     | 2,093 (2.2)          | 3,530 (2.5)              | 1.07 (1.01-1.13)                     |
| Gastrointestinal tract (C15–20)    | 2,760 (1.6)           | 2,636 (2.0)              | 0.93 (0.88-0.99)                     | 724 (0.8)            | 1,301 (0.9)              | 1.01 (0.92-1.11)                     |
| Esophagus (C15)                    | 33 (0.0)              | 30 (0.0)                 | 0.91 (0.55-1.50)                     | 11 (0.0)             | 23 (0.0)                 | 0.79 (0.38-1.65)                     |
| Stomach (C16)                      | 930 (0.6)             | 908 (0.7)                | 0.93 (0.85-1.02)                     | 235 (0.2)            | 449 (0.3)                | 0.94 (0.80-1.11)                     |
| Colon and rectum (C18–20)          | 1,774 (1.0)           | 1,673 (1.2)              | 0.94 (0.88-1.01)                     | 471 (0.5)            | 812 (0.6)                | 1.06 (0.94-1.19)                     |
| Hepato-biliary-pancreatic (C22–25) | 4,857 (2.9)           | 4,016 (3.0)              | 1.08 (1.03-1.13)                     | 1,308 (1.4)          | 2,094 (1.4)              | 1.13 (1.05-1.21)                     |
| Liver and biliary tract (C22–24)   | 3,175 (1.9)           | 2,727 (2.0)              | 1.05 (0.99-1.11)                     | 764 (0.8)            | 1,295 (0.9)              | 1.09 (0.99-1.20)                     |
| Pancreas (C25)                     | 1,682 (1.0)           | 1,289 (1.0)              | 1.15 (1.06-1.24)                     | 544 (0.6)            | 799 (0.6)                | 1.19 (1.06-1.33)                     |
| Lung (C34)                         | 1,691 (1.0)           | 1,176 (0.9)              | 1.30 (1.20-1.40)                     | 505 (0.5)            | 686 (0.5)                | 1.28 (1.13-1.44)                     |
| Bone and soft tissue (C40–C41)     | 74 (0.0)              | 41 (0.0)                 | 1.59 (1.08-2.35)                     | 16 (0.0)             | 14 (0.0)                 | 2.21 (1.05-4.65)                     |
| Limb (C40)                         | 26 (0.0)              | 10 (0.0)                 | 2.26 (1.07-4.77)                     | 5 (0.0)              | 5 (0.0)                  | 2.56 (0.71-9.29)                     |
| Other sites (C41)                  | 48 (0.0)              | 31 (0.0)                 | 1.37 (0.87-2.18)                     | 11 (0.0)             | 9 (0.0)                  | 2.04 (0.82-5.08)                     |
| Skin (C43–44)                      | 320 (0.2)             | 251 (0.2)                | 1.15 (0.97-1.36)                     | 92 (0.1)             | 140 (0.1)                | 1.17 (0.89-1.53)                     |
| Breast (C50)                       | 2,039 (1.2)           | 1,537 (1.1)              | 1.31 (1.23-1.41)                     | 577 (0.6)            | 846 (0.6)                | 1.42 (1.27-1.59)                     |
| Female genital system (C51–58)     | 3,034 (1.8)           | 2,556 (1.9)              | 1.18 (1.12-1.24)                     | 987 (1.0)            | 1,517 (1.1)              | 1.36 (1.26-1.48)                     |
| Cervix (C53)                       | 386 (0.2)             | 393 (0.3)                | 0.95 (0.82-1.10)                     | 123 (0.1)            | 188 (0.1)                | 1.35 (1.07-1.71)                     |
| Uterus (C54–C55)                   | 875 (0.5)             | 650 (0.5)                | 1.35 (1.22-1.50)                     | 333 (0.3)            | 501 (0.4)                | 1.37 (1.19-1.59)                     |
| Ovary (C56–C57)                    | 1,761 (1.0)           | 1,497 (1.1)              | 1.17 (1.09-1.26)                     | 526 (0.5)            | 824 (0.6)                | 1.36 (1.21-1.52)                     |
| Male genital system (C60–C63)      | 1,179 (0.7)           | 1,237 (0.9)              | 0.84 (0.78-0.91)                     | 303 (0.3)            | 629 (0.4)                | 0.85 (0.74-0.98)                     |
| Prostate (C61)                     | 1,159 (0.7)           | 1,223 (0.9)              | 0.84 (0.77-0.91)                     | 300 (0.3)            | 619 (0.4)                | 0.86 (0.74-0.99)                     |
| Urinary system (C64–C68)           | 1,257 (0.7)           | 974 (0.7)                | 1.18 (1.08-1.28)                     | 417 (0.4)            | 561 (0.4)                | 1.34 (1.18-1.53)                     |
| Kidney (C64)                       | 426 (0.3)             | 256 (0.2)                | 1.52 (1.30-1.79)                     | 103 (0.1)            | 126 (0.1)                | 1.53 (1.17-2.01)                     |
| Bladder (C67)                      | 746 (0.4)             | 663 (0.5)                | 1.02 (0.92-1.14)                     | 290 (0.3)            | 395 (0.3)                | 1.31 (1.12-1.53)                     |
| Eye, orbit (C69)                   | 20 (0.0)              | 11 (0.0)                 | 1.83 (0.85-3.94)                     | 4 (0.0)              | 11 (0.0)                 | 0.81 (0.25-2.63)                     |
| Brain, CNS (C70–C72)               | 216 (0.1)             | 144 (0.1)                | 1.44 (1.16-1.79)                     | 69 (0.1)             | 81 (0.1)                 | 1.49 (1.07-2.07)                     |
| Adrenal gland (C74)                | 63 (0.0)              | 17 (0.0)                 | 3.54 (2.05-6.13)                     | 10 (0.0)             | 13 (0.0)                 | 1.40 (0.60-3.29)                     |
| Hematologic system (C81–C96)       | 528 (0.3)             | 337 (0.3)                | 1.42 (1.24-1.64)                     | 154 (0.2)            | 196 (0.1)                | 1.38 (1.11-1.72)                     |
| Hodgkin Disease (C81)              | 4 (0.0)               | 2 (0.00)                 | 1.75 (0.31-9.76)                     | 3 (0.0)              | 4 (0.0)                  | 1.58 (0.34-7.40)                     |
| Non-Hodgkin lymphoma (C82–C86)     | 147 (0.1)             | 119 (0.1)                | 1.11 (0.87-1.42)                     | 43 (0.0)             | 46 (0.0)                 | 1.75 (1.13-2.69)                     |
| Multiple myeloma (C90)             | 174 (0.1)             | 112 (0.1)                | 1.33 (1.04-1.69)                     | 60 (0.1)             | 89 (0.1)                 | 1.11 (0.79-1.55)                     |
| Leukemia (C91–C95)                 | 155 (0.1)             | 65 (0.1)                 | 2.37 (1.76-3.19)                     | 41 (0.0)             | 31 (0.0)                 | 2.48 (1.53-4.02)                     |



HR, hazard ratio; CI, confidence interval; C, diagnostic code used in the International Classification of Diseases (ICD)-10; CNS, central nervous system. <sup>a</sup>Adjusted HR for Charlson Comorbidity Index
